# Supplementary material for: External Light Conditions and Internal Cell Cycle Phases Coordinate Accumulation of Chloroplast and Mitochondrial Transcripts in the Red Alga Cyanidioschyzon merolae
Source: PubMed Central journal article supplement — DNA Res. 2012 Apr 19;19(3):289–303. doi: 10.1093/dnares/dss013 (PMC3372377; doi:10.1093/dnares/dss013), 2012-04-19
Supplement: supp_dss013_dss013supp.pdf [file supp_dss013_dss013supp.pdf]

## LEGENDS FOR SUPPLEMENTAL FIGURES

Supplemental fig. 1. Control experiment for microarray analysis. aRNA probes were synthesized from the same sample and were labeled with Cy3 and Cy5. Probes were competitively hybridized with the same DNA microarray. Horizontal axis and vertical axis show intensity of each spot due to Cy3 and Cy5, respectively. Diagonal line indicates no difference in signal intensity between the two samples. Dashed lines indicate a 2-times difference in signal intensities. Signals were normalized against internal control spots (see materials and methods).

Supplemental fig. 2. Cells of *C. merolae* 10D were cultured in MA2 medium in a jar fermenter with light-dark-dependent synchronization as described previously (4) with minor modifications. Cells were cultured at 42°C and were aerated with 2% CO<sub>2</sub> in air. Cultures were subjected to the following light conditions; 6 h light, 18 h dark, and continuous light. Synchronization of the culture was initiated at end of first dark period (time 0). For DNA microarray analyses, cells were sampled during the period from 0 to 48 h (time 0 to 48), during which cell cycle phases were highly synchronous. Values are means of three independent experiments ± SD.

Supplemental fig. 3. Correlation network of organelle genes. Network chart was produced by relative network function of MeV software (TIGR). Each ORF is shown as a gray oval. Interaction between two genes is shown by blue or red line, where blue or red line indicates a correlation coefficient greater than 0.7 or 0.8, respectively.

Supplemental fig. 4. Preparation and specificity of antibodies. (A–D) Aliquots of *C. merolae* total protein (Cm) were separated by 10% SDS-PAGE and analyzed by immunoblot analysis with indicated antibodies. (A, C, D) Re. indicates His-tagged CmSIGs, which harbors approximately 10 kDa extra peptide derived from the His-tag and expression vector linker sequence, expressed in *E. coli*. (B) Re. indicates recombinant CmSIG2, which harbors about 60 kDa extra peptide derived from the SecA-fragment. Positions of molecular size markers were indicated at the left.

Supplemental fig. 5. Putative element found in 3'-downstream region within 120 base of the ORFs in light-dependent genes in figure 2A. Identification of the element was performed by CONSENSUS, MEME and MD scan in Melina II (<http://melina2.hgc.jp/public/index.html>). The ORFs, which does not possess this element in 3' downstream region was not the terminal gene of the putative operon. Positions of the element in the 3' downstream region are shown in the panel of each gene. Both CONSENSUS and MD scan called almost the same element.

Supplemental fig. 6. Putative element found in 3'-downstream region within 120 base of the ORFs in cell-cycle dependent genes in figure 2B. Identification of the element was performed by CONSENSUS, MEME and MD scan in Melina II (<http://melina2.hgc.jp/public/index.html>). The ORFs, which does not possess this element in 3' downstream region was not the terminal gene of the putative operon without an exception of CMV225C gene. Positions of the element in the 3' downstream region are shown in the panel of each gene. Both CONSENSUS and MD scan called almost the same element (The panel of MD scan shows the element as opposite direction).

Supplemental Table I. Specific oligo-primers for construction of custom DNA microarray.

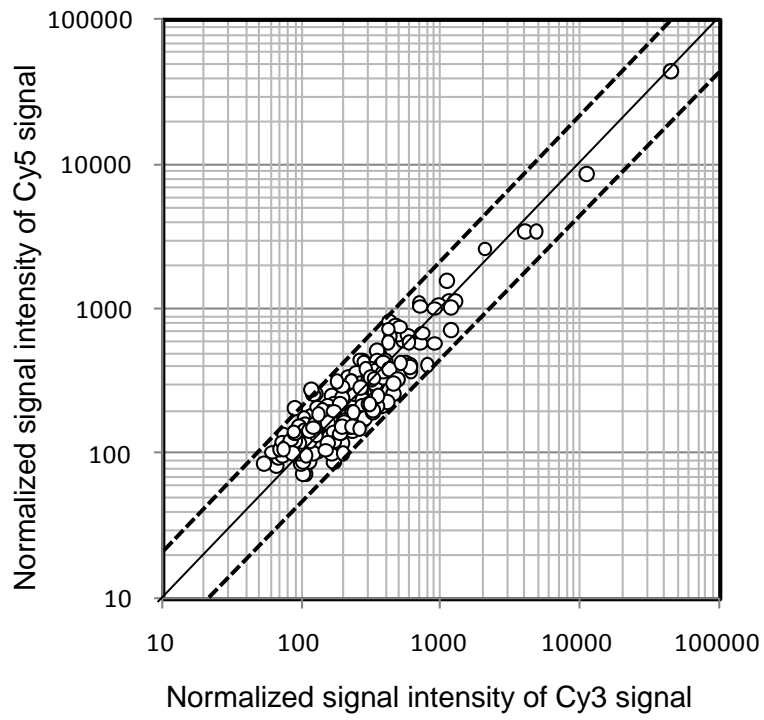

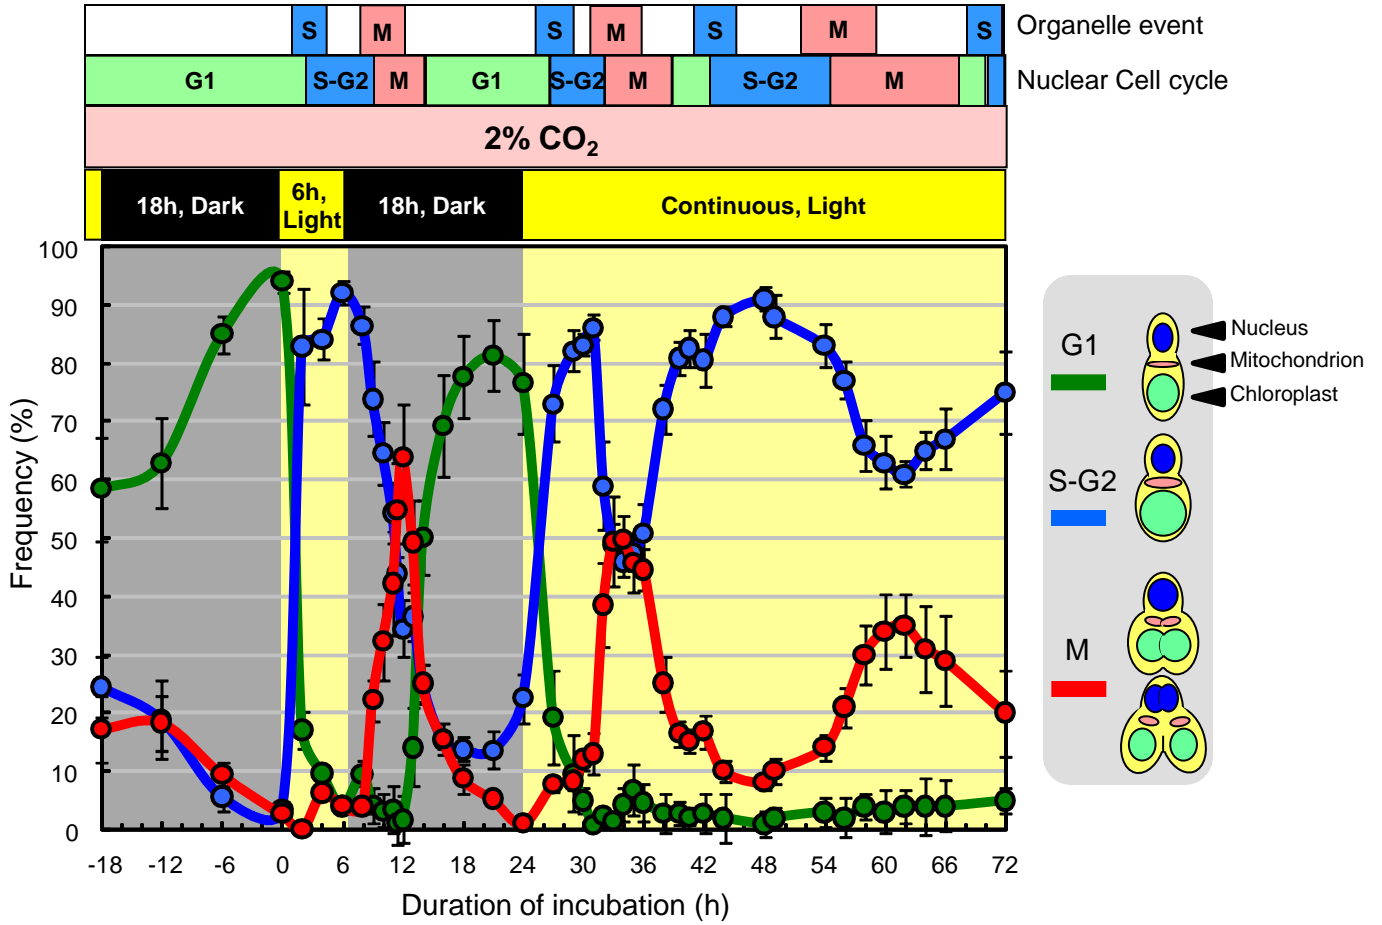

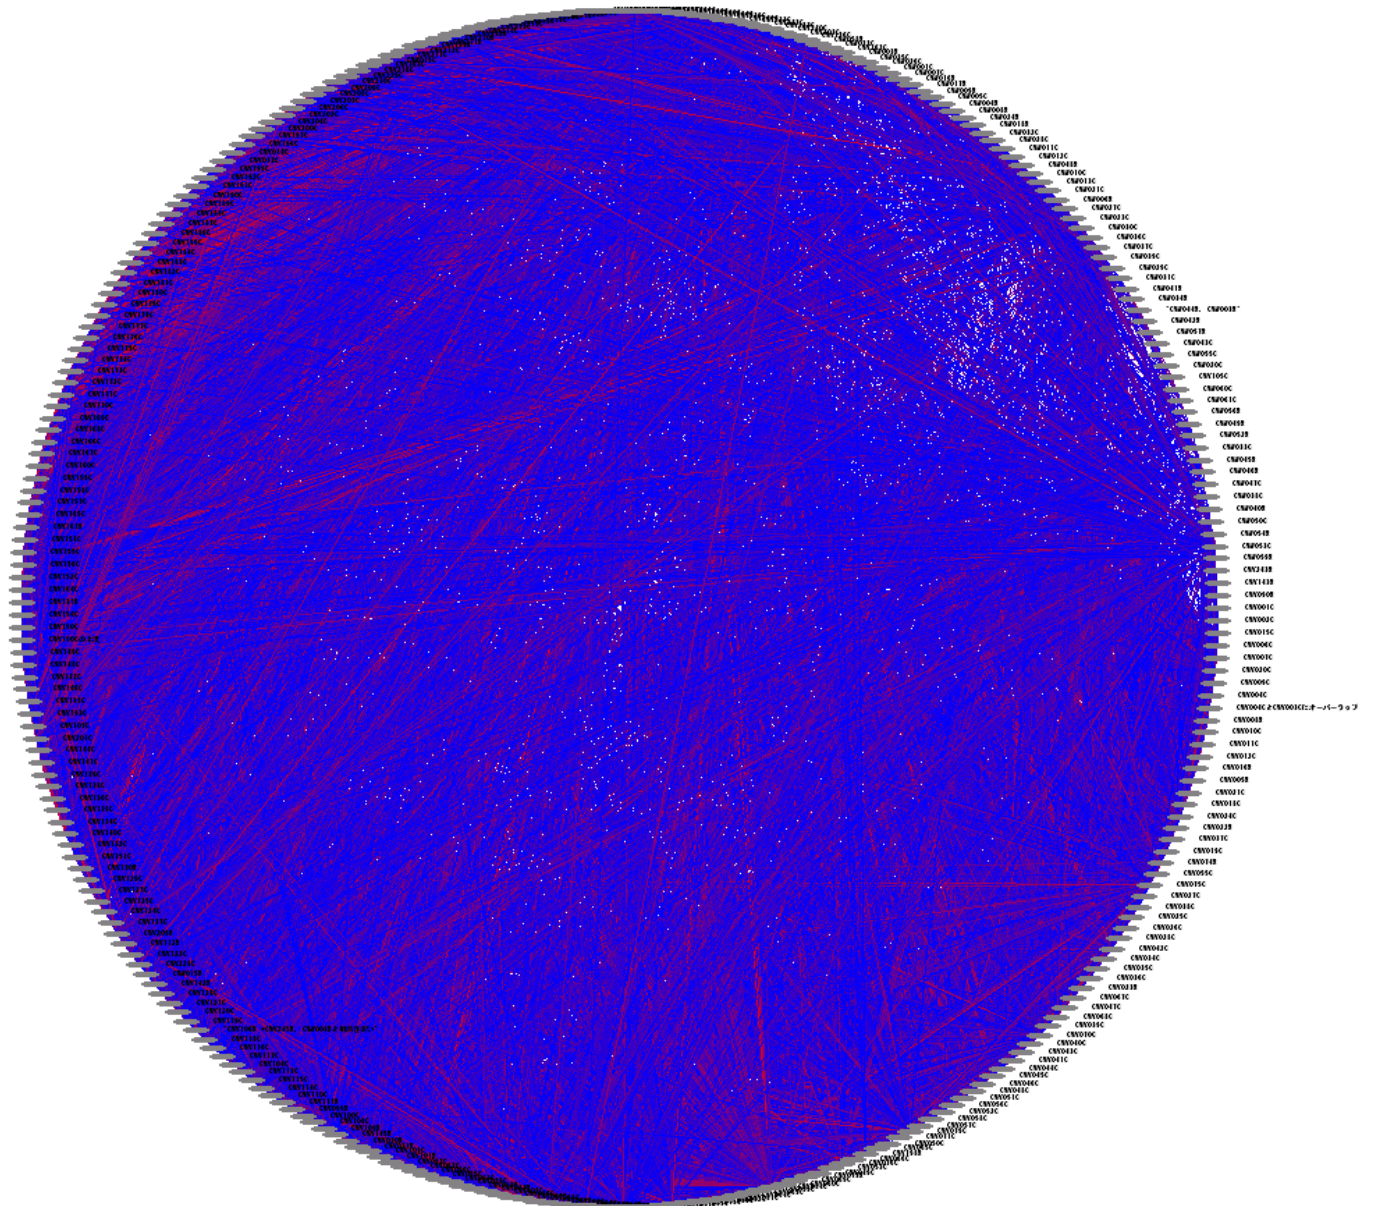

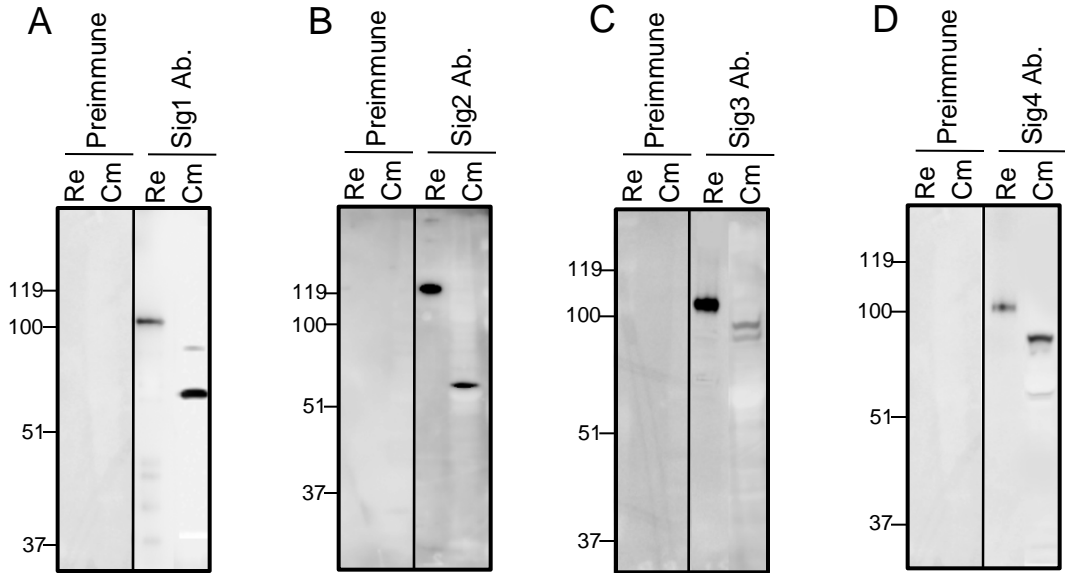

# Supplemental Figure 5

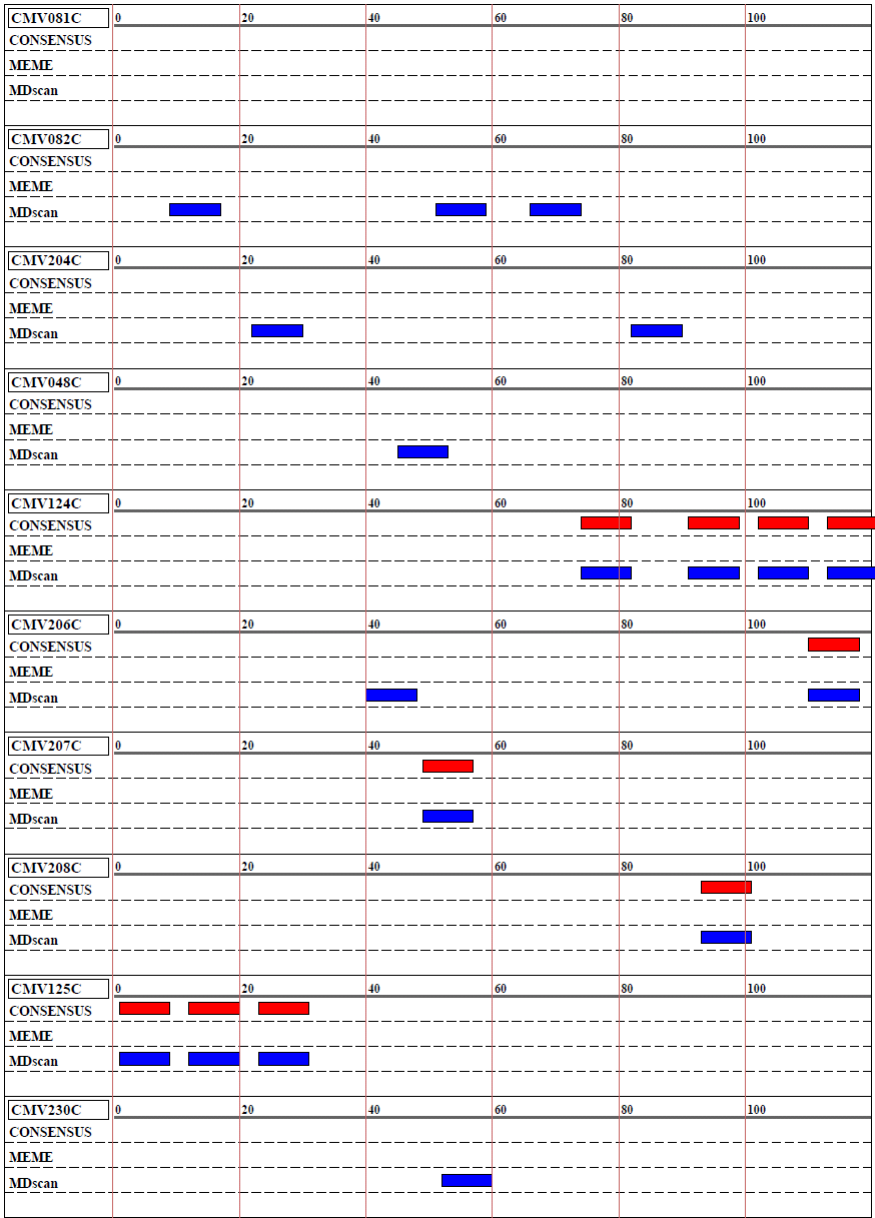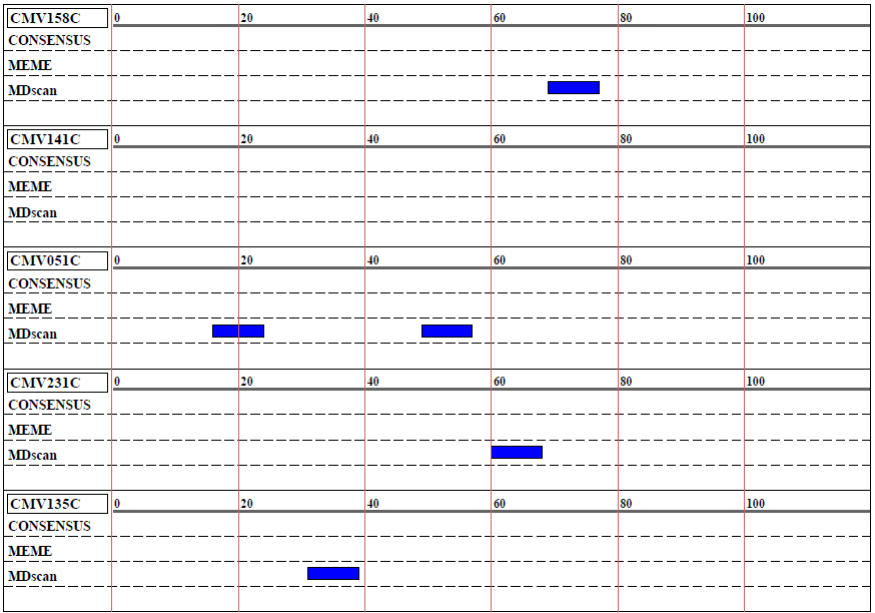

CONSENSUS

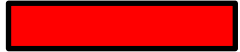

MD Scan

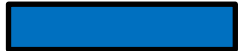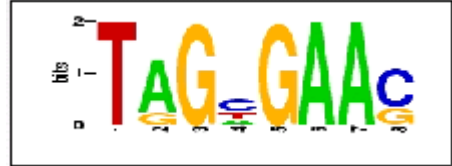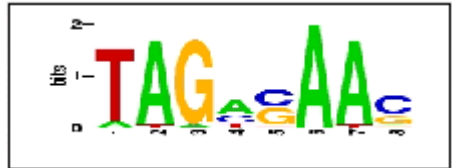

# Supplemental Figure 6

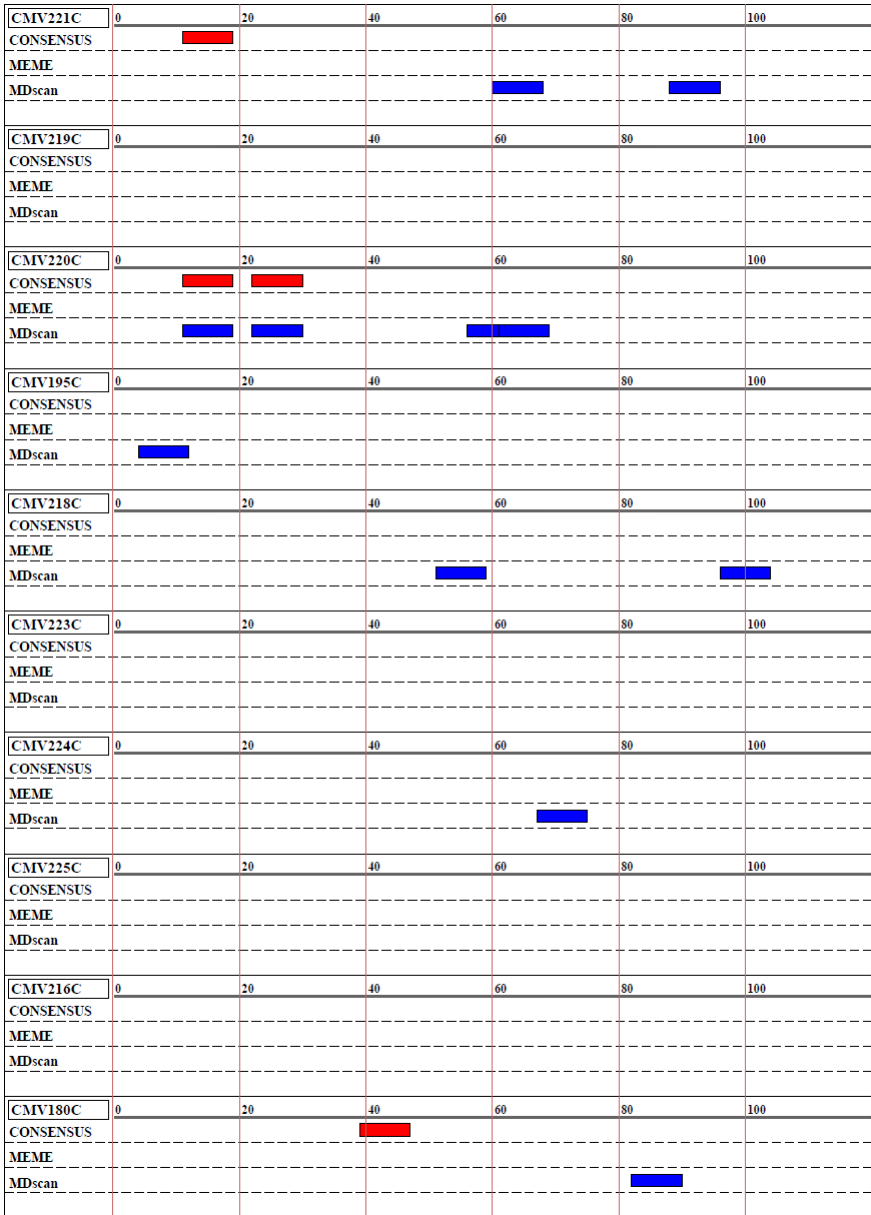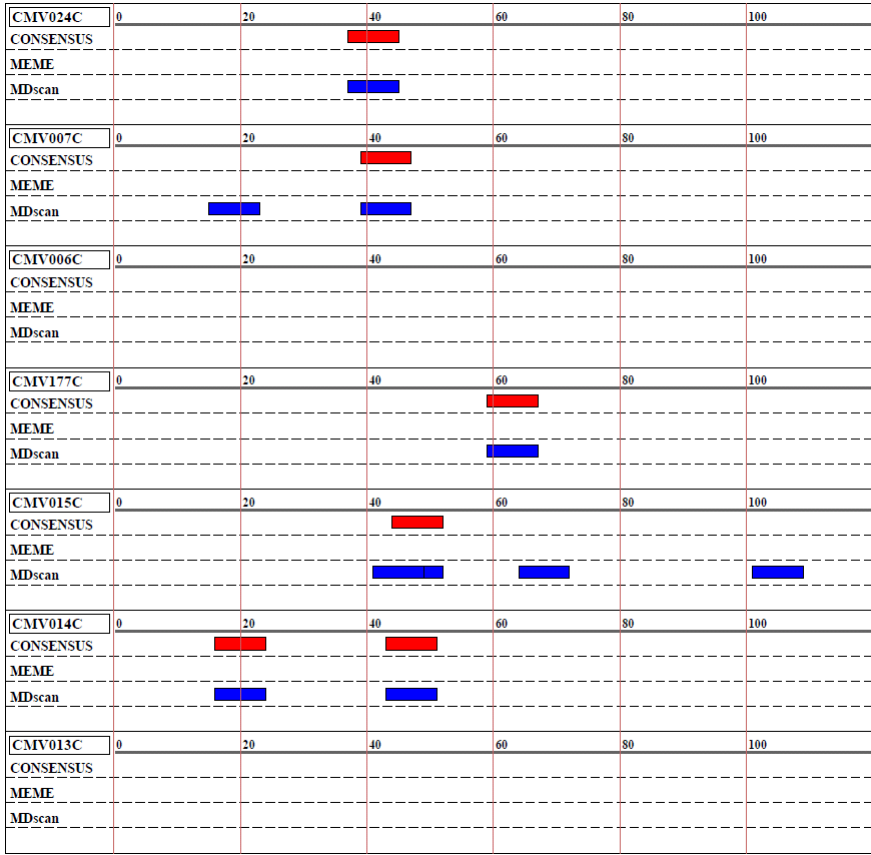

CONSENSUS

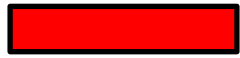

MD Scan

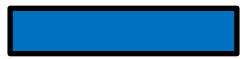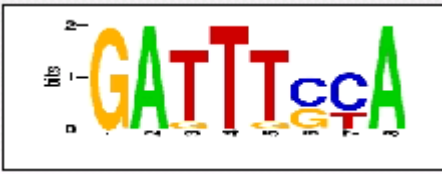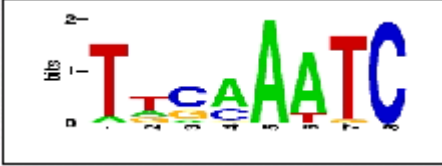



Supplemental table I. Specific oligo-primers for construction of custom DNA microarray.

| Organelle | ORF number | Name    | Sequence of designed 50 mer oligonucleotide         | Additional information |
|-----------|------------|---------|-----------------------------------------------------|------------------------|
| Plastid   | CMV001C    | ycf24   | AATTAGTTGGACACAAGTGGAAACAGGATCAGCTATAACATGGAATATC   |                        |
| Plastid   | CMV002C    | ycf16   | GCCTATGTCTTAATTACGCATTATCCAAGACTCTAGAATATATCAAGCC   |                        |
| Plastid   | CMV003C    | ycf12   | CGTTCTAGCTCAATTAACCGTTTTAGCTTTTGTATAGCAGTAGGTCCTA   |                        |
| Plastid   | CMV004C    | ycf62   | ACTACTGAACAAGATGCACGCCAATACCGATATGCTAATTTAATTCAGCT  |                        |
| Plastid   | CMV005R    | trnK    | CTAACTCAATGGTAGAGTACTCGGCTTTAACCGATTAGTCCGGGTTTCG   |                        |
| Plastid   | CMV006C    | trpA    | CGTGATAGAAATAGGAGTTCATATTCAGATGCTTTAGCTGATGGTGCGA   |                        |
| Plastid   | CMV007C    | infB    | ACAGGTGGAGAATATGAAATCTGGCGAAAGAATCAATATCAAGCAAGAGC  |                        |
| Plastid   | CMV008R    | trnT    | TAGTATAGCTCAATGGTAGAGCAGCTGATTTGTAATCAGCCGGTTGCAG   |                        |
| Plastid   | CMV009C    | rps4    | TGCAAGATATTTAGGACCAAGAGTTCGATTATTCGTCGTTTAGGCATC    |                        |
| Plastid   | CMV010C    | ycf80   | CCCTCTCGACAACCTTTGCAAAATGGTCCAATTTGAAGGTAATCCTGTTT  |                        |
| Plastid   | CMV011C    | rpl28   | ATGAGTCGTGTTTGCCTTTAACTCTAAGAAGTGTAAATCATGCTTTTCG   |                        |
| Plastid   | CMV012C    | trxM    | CGTGTGATACTGTTATCGGTGCTGTTCCCTAAATCCATTTAATTCATAC   |                        |
| Plastid   | CMV013C    | rbcL    | ATCGTTACTTATATGTAATGGAAGGTGTGAATAGAGCAGCCGACATCT    |                        |
| Plastid   | CMV014C    | rbcS    | GGGATTACCTCTATTTGATGTGAAAGACCCTGCTACAATCATGTTTGAAG  |                        |
| Plastid   | CMV015C    | cfxQ    | GTGACACGAGATGATTTAGTAGGACAATATATAGGACATACAGCACCAAA  |                        |
| Plastid   | CMV016R    | trnC    | CAAGCGGTAAAGGAGAGGATTGCAAAATCCTTTACCCCAAGTTCGAATCTG |                        |
| Plastid   | CMV017R    | trnL    | CAGACTTAAAATCTGTTGATTCTTTTCGAATCGTGAGGGTTCAAGTCCCT  |                        |
| Plastid   | CMV018C    | ilvH    | AAACATACTTTATCTGTATTAGTAGAAGATGAGGCAGGCGTTTTAACTCG  |                        |
| Plastid   | CMV019C    | ycf84   | CAACAGCCTGGATAAGTCAACAACAATGGCAACCTATGTGGATGAATGTA  |                        |
| Plastid   | CMV020C    | ycf85   | TCTCCCAACAAGTATGCAGCCATTATCTGGTGGTGAACGCAAACGAGTC   |                        |
| Plastid   | CMV021C    | infC    | AAGAAATCAAATGAGTTACAACATGGAAGAACATGACTATCAAGTGCGA   |                        |
| Plastid   | CMV022R    | trnM    | TATGGCCGAGCGGCTTAAGGACGCGGACTCATAATCCGTGGACAAGAATT  |                        |
| Plastid   | CMV023R    | ssrA    | GCTGTAACATGGGGCTGAAGGTGTTTCGACATAAGTTGTTGTTATTCAAT  |                        |
| Plastid   | CMV024C    | chlI    | GATATTGTACCAATAGAGCTGCTTGTGCTCACGCCGCTTAAGAAATTG    |                        |
| Plastid   | CMV025C    | trmE    | CTACAAGTGCTCTTGATGAGGGTTATCCTTTAGAAATTATCAGTTGGCA   |                        |
| Plastid   | CMV026C    | lpxC    | TGTAAGGGAATAGGGTTACATACAGGGCGATTGGTGAAGTAAAGATGT    |                        |
| Plastid   | CMV027C    | lpxA    | GGAGATTAAGTATGATTGCAGGCATGAGTAGGATTGATAGAGATGTACCA  |                        |
| Plastid   | CMV028C    | psaM    | AGTGTGTTGAGCTTTGATTATGGCTTTAGTTTGGGGTATTTGGCTGTAA   |                        |
| Plastid   | CMV029R    | rrn16   | CTGGCTCAGGATGAACGCTGGCGGTATGCTTAACACATGCAAGTGAACG   |                        |
| Plastid   | CMV030R    | trnI    | CTATTAGCTCAGTTGGTGGAGCGCACCCCTGATAAGGGTGAAGTCTCTG   |                        |
| Plastid   | CMV031R    | trnA    | GGGGTATAGCTCAGTTGGTAGAGCGCTGCCTTTGCAAGACAGTGGTCAGC  |                        |
| Plastid   | CMV032R    | rrn23   | CATGGAGTTGTGGGAAAGGCCTTGAACGTACAGCTAAGGTTAGTTTAAAG  |                        |
| Plastid   | CMV033R    | rrn5    | CGAGGGTGTCTATGCGACTCATGATCCACTCCGACTCCTTTCCGAATTC   |                        |
| Plastid   | CMV034C    | rpl21   | TGCTCGTCAACTTTAACTCGTATCTACATTCATCCTTTCCATGGCTCAT   |                        |
| Plastid   | CMV035C    | rpl27   | ACCTACAATCCATATTCATCCTATCAGTCATCCTATCAGTCATCCTATCA  |                        |
| Plastid   | CMV036C    | carA    | GAGTTATGCACGCCATCGCTTCCAATCAACTTCTTGATCTCTCAACTT    |                        |
| Plastid   | CMV037C    | ycf53   | AGAAGGATTTGGTTAGCGAAACAGAAGGATTGGATGAAATTTGGGAACA   |                        |
| Plastid   | CMV038C    | ycf55   | GGTATAGAGAAGGGTATAGAGATTTGAAACCTAGTTGGTTACGAGCCATG  |                        |
| Plastid   | CMV039C    | cobA    | TTAGGTACGATTTCTACAATCAACCATCAAATCCAACGCCATCAATTTGG  |                        |
| Plastid   | CMV040C    | ycf54   | CAATTCATGCTTATTGTTTCTACTGATGCTACTTGGATTGATTGGCTCAA  |                        |
| Plastid   | CMV041C    | crtR    | ACATTCTAATGAATACATCAACGGTATCATAGGTCACGTATGTGGGTTCT  |                        |
| Plastid   | CMV042C    | cysW    | GGTAGATTAAGTGTCTTATGTAGTACAGCTACTGTATTGATGAATGGCCT  |                        |
| Plastid   | CMV043C    | cysT    | GCCTAATTTAGTACCAGCGATCAAACTGTTTAGGTTAACCTGGAGTC     |                        |
| Plastid   | CMV044C    | ycf30   | TCTCTATCGGTTAAGATTTGTCAGCTTAGATCGTCATCCACCATACGAA   |                        |
| Plastid   | CMV045C    | psbY    | TTTGCTTCTATTATCGCCGCGCTTCTGGGCTATTTATAACATTTGGTA    |                        |
| Plastid   | CMV046C    | rpl32   | AAAACGTACACCTAAGTCAAAAACCTCGAAGCCGAAAAGTCAATGGATGC  |                        |
| Plastid   | CMV047C    | psbA    | TATCTTAAACCGTGCGAATCTAGGTATCGAAGTTATGCATGAACGTAATG  |                        |
| Plastid   | CMV048C    | apcF    | ATGCTTTATTTACATCACAACCTGAATTACTTCGACCTAGTGGAAATGCT  |                        |
| Plastid   | CMV049C    | ycf20   | TGGATGTCTCATTGTTTCATTTGTTGTTAGGTGTTGCTTATCTTCCCT    |                        |
| Plastid   | CMV050C    | lipB    | GCATTCTACAGCGGCCAGTATCTTGGGTGCATTGCGTCTTCACTACTACA  |                        |
| Plastid   | CMV051C    | cpcG    | GATACATTACCAACTGCATCAGAGATGGATCAGTTAATCTGGGCAGCTTA  |                        |
| Plastid   | CMV052C    | nblA    | TGAAACTTACTTTAGAACAAGAATTTCAATTACGAGTTTATCGACAACAA  |                        |
| Plastid   | CMV053C    | ccsA    | CAGTGGCGTTAAGTATTGCTATTGGTACACCTCTAGTGATGCTTGTAGT   |                        |
| Plastid   | CMV054C    | ORF47.1 | AACTCAAACATCTTTGAATGTCAACTTAACTTAACTCAACCTCACTATTCA |                        |
| Plastid   | CMV055C    | psaK    | GGTACATTATAGGAGTGGGTATAGTCTTAGGTTTATCAAACATGGGCGT   |                        |
| Plastid   | CMV056C    | accA    | ATGAGTCAAGATTGGATTGAATTGCACGGAGATCGAAAAGGTAGTGATGA  |                        |
| Plastid   | CMV057C    | ycf22   | ATGTGTAGTTTAAACGAATTTAAGTATGAAATGTTGGCTTTAATCCGCAT  |                        |
| Plastid   | CMV058C    | ycf23   | GTGTGAAGGCAGGGGAGACATGCTGGAATTTGGGAATTATGATAGTTTG   |                        |
| Plastid   | CMV059C    | psaC    | TGTATAGGATGTACACAATGTGTAAGAGCATGTCATTAGATGTGTTAGA   |                        |
| Plastid   | CMV060C    | glbB    | ATTCAGTCTGAGTCCAAGTCTGAGTCCACAAGTCAAGATACTTATATCC   |                        |
| Plastid   | CMV061C    | rpoZ    | TGAAACTGTTAAATCAAATGGAATTTATTGTTCTACTTGAAGAATCGT    |                        |
| Plastid   | CMV062C    | glmS    | TATCGGCATGTAGTTTAACTAGCCATAAGTCAATCAGGAGAAACAGCG    |                        |
| Plastid   | CMV063C    | cpcA    | GTAGGTAAGCTAAATGTTCTAGAGATGTTGGCTATTACTTACGTATGAT   |                        |
| Plastid   | CMV064C    | cpcB    | ATATCAGCTATGCTATGATCGCAGGTGATTCAAGCGTATTAGATGACCGT  |                        |
| Plastid   | CMV065C    | ORF47.2 | TGCATCTAACATTTCTTATTCTCCTTGTCTTCAATTTCCAGTCT        |                        |
| Plastid   | CMV066C    | ORF32   | AAACTTCGATAAATATCTTGAATTTAATCGTATCATATTTGCATGGA     |                        |
| Plastid   | CMV067C    | ORF40   | GGTATTGCTTCGGGGATTCTTAGTCTACACCTTGTGGAACACCACCC     |                        |
| Plastid   | CMV068C    | ORF45   | TTAGTCACTTGCCTTCGAGGGTGTGCGCTAGGGGAGAGTGGGGTTC      |                        |
| Plastid   | CMV069C    | ORF44   | ATGAATGAGGATACACCTTGTGGAAGAGGCGGAGTTGGGGACGGCGG     |                        |
| Plastid   | CMV070C    | ORF60   | ATTAGATTCATCAGATTCATCAACTTCTACCCTTTCTTCTCTCT        |                        |
| Plastid   | CMV071C    | secA    | AAGGACGGACATATTAAGAAGTGAAGAGGTAGGAGAATGGAGTAAGAGTT  |                        |
| Plastid   | CMV072C    | rpl34   | GGTGAAGAGTAAAAAGTGATAAATAGGAGAAGAAGGAAAGGGAGAAGT    |                        |
| Plastid   | CMV073R    | rpl34   | AATGGTAGACCGCCAGACTTAGGATCTGGTAAGTTCTTGTGAGAGT      |                        |
| Plastid   | CMV074R    | trnL    | GATAGCTCAGCGGTAGAGCGGTGGCTGTTAACCATTGGCCGTAGGTTTC   |                        |
| Plastid   | CMV075C    | ycf44   | AAAGGAAGATGGATCTATCAACAGATTGGAAGTGGGAAGGAGTAAGGAT   |                        |
| Plastid   | CMV076C    | trpG    | TCTTCCCTTCTCTTTTACCATTGCTCTATCATTATCTCTCTGGACC      |                        |
| Plastid   | CMV077C    | thiG    | TGTCGTACTTGTCTCCGAAAGCTGTTGTTGGCTCTTCTTGTCTGTCAT    |                        |
| Plastid   | CMV078C    | ycf60   | ATATTATTATATTGAGGATGGGAAGTGTGATCTACGCAAGTTATCAAGT   |                        |



|         |               |         |                                                     |                                                              |
|---------|---------------|---------|-----------------------------------------------------|--------------------------------------------------------------|
| Plastid | CMV079C       | rps6    | AAAGTTGGAGAAGTATTTGCAGGTAATGAGAAGGGATTGAGATATATGA   |                                                              |
| Plastid | CMV080C       | ycf27   | TATCAAAGGTTTACTTCGACGTACAAATCAGGATCAAAGTTGGCACTTGG  |                                                              |
| Plastid | CMV081C       | psbD    | TGTGTTTCATAGGTTGGTCAGGCTTACTTCTGTTCCCTTGTCTTATCTTG  |                                                              |
| Plastid | CMV082C       | psbC    | TGGGTTTCATTAATTCAGTAGGAGGTGTGGCAACAGAAATTAACCTCAGTG |                                                              |
| Plastid | CMV083C       | ycf19   | TCTACATAGCAATAATCTTACTGCGGATTTGTTAAGTTGGTTCCAGCA    |                                                              |
| Plastid | CMV084C       | rps16   | GTCGTGAGGAATGCCTAGCTATAGAGTGGTAGTTATGAGAAGTCAGACT   |                                                              |
| Plastid | CMV085C       | ycf65   | GGATATCGGCCATACAAAGGAAAGTACTACTAGATGAGGCAACATATGTC  |                                                              |
| Plastid | CMV086C       | groEL   | CGATGTGAACAAATTAACAACAATGGGCTCGCAGTGATTCCAGTTACGA   |                                                              |
| Plastid | CMV087R       | trnR    | CTTGTAGCTCAGGGGATAAGAGCACGTGGCTACGAACCACGGTGTGGGG   |                                                              |
| Plastid | CMV088R       | trnQ    | CCAAGTGGTAAGGCAGCGGACTTTGACTCCGCCATTGTTAGGTTTCAATC  |                                                              |
| Plastid | CMV089C       | psbW    | CGTTTAACTCGTTCAAGAGATGGACAACTGGTACGGCAGTATTTGTTT    |                                                              |
| Plastid | CMV090R       | rnpB    | TATTTAACATAGGTAAGGGTGCAAAGGTGCGGTAAGAGCGTACCAATTA   |                                                              |
| Plastid | CMV091C       | rps1    | GTATCATGTCAAAGCTTGATCTACTCACGTTCTTAAGTCGTTTATTGCA   |                                                              |
| Plastid | CMV092C       | ycf40   | TGCTTGTGATTTATATTAACGGTCATCTACTTTATTCAAACGTGTCATG   |                                                              |
| Plastid | CMV093R       | rps1    | AAGTGGTTAAGGCAATGGATTGTGGCTCCATCATCTCGCGGTTCAAATC   |                                                              |
| Plastid | CMV094C       | ycf29   | GAGTTGACGCCAAAGAACAACATCTACTCAATGCTACTGCCAGAGGCTT   |                                                              |
| Plastid | CMV095C       | ycf28   | TTGGCGTATTATTATGCTCAAGAATCTCCAAAAGGCTTGTATATCCCATG  |                                                              |
| Plastid | CMV096C       | petB    | GTTTGCATACGTTAGTTTTACCAGTCTTGTCTTAGTCTTTATGTTAGCG   |                                                              |
| Plastid | CMV097C       | petD    | GTTCTTAGTGGGCACAGTGGTAACGATTTGGTTAGGAATAGGAGCAACAA  |                                                              |
| Plastid | CMV098C       | dnaB    | AGAATTGGATGTTCTGTAGTGGTTCTATCTCAACTTAGTCGGAATGTGG   |                                                              |
| Plastid | CMV099R       | petD    | GAGAGATGGCTGAGTGGTCTAAAGCGTAGCATTGGAATGCTATGAAAAC   |                                                              |
| Plastid | CMV100C       | moeB    | CTCTGTAGTATAGGAGTGGGTTACTTAGGCTTAGTGGATGGAGATGAAGT  |                                                              |
| Plastid | CMV101R       | trnS    | ACATAGGCTCCTAAAACCTATTGTGGAAGGTTGAGTCCCTCAGGGCGTG   |                                                              |
| Plastid | CMV102C       | rpl11   | GTTACTCATTCTCTCAAACCCACCGCTTCTGTACTTTTAAAACGT       |                                                              |
| Plastid | CMV103C       | rpl1    | GCAATCAAAGAATCTGTAGAACTAATAAACCTCCGGTGTCTTGGACT     |                                                              |
| Plastid | CMV104C       | rpl12   | TCCGCATCTGAAGCTGAACAACCTAAGACTCAATTAACGGAAGCTGGTGC  |                                                              |
| Plastid | CMV105C       | ORF41.1 | TGTCAGAAGTAGAGAAATGGATAAGATTGAGGAAAGTTCTTATCTTAAA   |                                                              |
| Plastid | CMV106R       | trnF    | AGTTGGTAGAGCAGAGGACTGAAAATCCTTGTGTACGAGTTCAAATCTC   | 86% and 84% identical with CMV245R and CMW008R, respectively |
| Plastid | CMV107C       | clpC    | AAGGATGCAGCATTAGAACGCGGATTCACCTGTGTCATGGTAGGAGAACC  |                                                              |
| Plastid | CMV108C       | rpl19   | ACGATCAGAAGTCTTCTATCCGGGGTAGGTTGAACGATTTTTGTATTT    |                                                              |
| Plastid | CMV109R       | clpC    | GATATATAGCTCAGTCTGGTAGAGCATCACGTTGACGTCGTGAGGGTCAC  |                                                              |
| Plastid | CMV110C       | ycf17   | AACAATGCCGAGATGTTGAATGGTGCCTTGCTATGTTAGGGTTGTAGC    |                                                              |
| Plastid | CMV111R       | trnV    | CCCGAGTGGCTAATGGGGGCGGACTGTAATCCGCTGGCTACGCCTACG    |                                                              |
| Plastid | CMV112R       | ycf17   | CTTGTAGCTCATTGGTAGAGCATTCCCTTGGTAAGGAAAGGTGGCGAGT   |                                                              |
| Plastid | CMV113C       | menB    | GATGATGATATAGGAGTCGTGATCTTAACCGGAGAAGGAACAAGAGCGTT  |                                                              |
| Plastid | CMV114C       | menF    | ATATTCATATTCGCCTACTCTATCTGGTTGGAATCAATGCTTACATCAA   |                                                              |
| Plastid | CMV115C       | menD    | ATGATCCTGTTTCATGTGTTTGGTAACCGTGGAGTAAGTGAATGATGGC   |                                                              |
| Plastid | CMV116C       | menA    | ATGGTTGATCTTTTCGACCCTTGGTTTTGGTTGCTTATGATGTGTGTTT   |                                                              |
| Plastid | CMV117C       | menC    | TGGTTTACCTCGGATGATCGATTTGGTGAATCATTGTTTGTACATACATC  |                                                              |
| Plastid | CMV118C       | menE    | ACCCTATGTTGATATGTGTTCACTGGTACCCACTCAAATATTTCCGGTTGA |                                                              |
| Plastid | CMV119C       | ycf83   | TCATTATCGCATTGCAAACATCATCAACTGGTAGCCTCTGTTTCTATGA   |                                                              |
| Plastid | CMV120C       | ORF138  | GCCTTGATGATTATGAGTGGAACTAATACACATAGCGACGGTTTGTTC    |                                                              |
| Plastid | CMV121C       | ycf82   | CTACAGATGCAGGAGCAGATCGGAAGTGTAGAACCTAACTTAGGAGTC    |                                                              |
| Plastid | CMV122C       | ilvB    | CGATTATCCCTTACTAATTCCTCGTCCTTCTCTTATCTATCCGCACAAG   |                                                              |
| Plastid | CMV123C       | ycf33   | AGTTTATTATTTCTTCTCTGTTAGGTTAATTACCTTTCTCTTGACACCT   |                                                              |
| Plastid | CMV124C       | psbB    | CATCGCATCATATAGCAGCAGGACTGTAGGATCTTGGCAGGAGTCTTC    |                                                              |
| Plastid | CMV125C       | psbT    | GGTACATTGATGATTATCTTCTTTGCCATTTCTTTAGAGAACCTCCAAG   |                                                              |
| Plastid | CMV126C       | psbN    | TAGTGTGTTTGTGCTAGTCTCGTTATCGGATTAAGTCTTATGCCATTT    |                                                              |
| Plastid | CMV127C       | psbH    | ATTTATAATTCAGTATTGCTTAAATGATGTACAAGTGGATTGGATGGG    |                                                              |
| Plastid | CMV128C       | psaE    | TTATATCCTGACTCGTGGATTTGATAAAGTTAATTATAGCGGCTTAA     |                                                              |
| Plastid | CMV129C       | ftsH    | GGGTGCTGGGATAGGAGGAGAAATGATGAAAGAGAACAGACATTAATC    |                                                              |
| Plastid | CMV130R       | trnD    | GCACCGCCTGTACGGCGGAAGTTGCGGTTTCGAGCCCCGTAGTCCCG     |                                                              |
| Plastid | CMV131R       | trnS    | CTGAGTGGTCGAAAGCAACAGATTGCTAATCTGTCGTATGGCCAAATTC   |                                                              |
| Plastid | CMV132C       | acpP    | GAGTGAACGCTCTCAAATTTCTCCTAATGCCAGTTTACGCATGATTTA    |                                                              |
| Plastid | CMV133C       | ycf86   | AAATCAGGATTAAAGCGTACCGATGAAGAACCAAATAGGACAGATAGCT   |                                                              |
| Plastid | CMV134C       | accB    | ACACCGAGACGTTGAAAGAAAGTTCAAAGAAAGTTGAAAGAAAGTTGCG   |                                                              |
| Plastid | CMV135C       | psaA    | ATATGTACGCAATGCCACCTATCCATACTTAGCAACCGATTATCCAACG   |                                                              |
| Plastid | CMV136C       | psaB    | CTTAGCTTGGACAGGTCAGTTAGTTCATGTGGCAATTCCTGCGTCAAGAG  |                                                              |
| Plastid | CMV137C       | rps14   | AAGACGCAGATGTTGGTTAACAGGCGGTAGTAGAGGTGTCTACCGTTATT  |                                                              |
| Plastid | CMV138C       | hisH    | GTTACCAGTGAAGTGATACCTCATATGGGTTGGAACAGGTTAGAGTGTG   |                                                              |
| Plastid | CMV139C       | petG    | GGTCTTATACCTATTACTATTCTGGGATTACTTATGGCCGCTTATTTCCA  |                                                              |
| Plastid | CMV140C       | psbK    | TTGATCGCTCAACTACCCGAAACTTATTCGATTTTGTCTCTGTTATTGA   |                                                              |
| Plastid | CMV141C       | psbZ    | ACCGCATCTGGTTGGTCTAAATCTAAATCTAGCATTGTTACTGCTCCAT   |                                                              |
| Plastid | CMV142R       | trnG    | GGTAGAGCGCAACCTTGCCAAAGTTGATGTGCGCGCTTGAATCGCGTTG   |                                                              |
| Plastid | CMV143R       | trnS    | GGCAGAGTGGTTGATTGCGGTAGTCTGAAAACCTATTGAATCGTGAGATT  |                                                              |
| Plastid | CMV144C       | psaD    | GCGTACTACCATACCAAGTTAATAAAGGTCGTGAACAAGTAGGACGTGTC  |                                                              |
| Plastid | CMV145R       | trnS    | GCGGAGTAGAGCAGTCTGGTAGCTCGTGGGCTCATAACCCGAAGGCCAA   |                                                              |
| Plastid | CMV146C       | ORF47.3 | AGGTTTGGCCTATTTTAGCACTTACCTTATCATCATATGCTTATCGGGT   |                                                              |
| Plastid | CMV147C       | petM    | GATCATATGCCGTTAATGGTTATGGTTGGTTTAGGAATGGGATTTGCAC   |                                                              |
| Plastid | CMV148C       | petN    | CAGTATAACTTGGGGTTGTCTGATGGCTACATTTACTGCCTCATTGGCAC  |                                                              |
| Plastid | CMV149C       | ycf59   | GGCGTTATATCAGGATTTATAGACATTTAGAGGCTCATCCAAAATGGAGT  |                                                              |
| Plastid | CMV150C       | rpl35   | AGGATTCAAATACCAAAGCACATTTAAGACGTAAAGCAGGCAAAAGTCA   |                                                              |
| Plastid | CMV150C (ups) | ORF38   | GTGCAATCTTATTAGTGCAATCTTACAAAACAAAGTGCAATCTTACA     | putative transcribed region                                  |
| Plastid | CMV151C       | rpl20   | GCCTATGGATTACCCGCTCAACGCCATCTTGGCGTATAAGTACAGTAAA   |                                                              |
| Plastid | CMV152C       | preA    | GAAATGATTCACACGGCTAGTTTATTGCATGATGATGGTAGATGAAGC    |                                                              |
| Plastid | CMV153C       | odpA    | TCAACAGGAGTAATCAAGCACTTGACAGAACATGATTATGTATGTAGTAC  |                                                              |
| Plastid | CMV154C       | odpB    | TTCAGCAGAACATTTCAACGTATAGAAGCCTACTTCCAAGCGGTTCCAG   |                                                              |
| Plastid | CMV155C       | petA    | TCCTCTTAAAGCACAGATCTACAAACCAATAACAAGTTCACTTTGTGA    |                                                              |
| Plastid | CMV156C       | tatC    | TCTCTTAGTTCCTTGTGTAAGTGTGTTGACGTTTCGAGTCAACCTG      |                                                              |
| Plastid | CMV157C       | apcE    | TCCATGTCAATACCATCAGCATTACCTCAAGATCGTCTAGAAGCCAATG   |                                                              |

|         |         |         |                                                     |
|---------|---------|---------|-----------------------------------------------------|
| Plastid | CMV158C | apcA    | GTGTAAGAAATGTACAACCTACTAGGAACACCAATTTTCAGCGGTAGCC   |
| Plastid | CMV159C | apcB    | GGAGCAACGATCCAATCTATTCAAGCGATGAAAGAAGTAACAGCAAGTTT  |
| Plastid | CMV160C | argB    | TATTTCTCACTTGTGTGGATTTCAAATCGTGGTAGTACATGGTGGAGGG   |
| Plastid | CMV161R | trnI    | AGGTTAGAGCGGGGACTCATAAGCCTCAGGTCGTAGGTTCAAATCTTAC   |
| Plastid | CMV162C | hupA    | AACAAGCGTCCCAATCTCAGGAAGATGCAGATAACAAACAAGATGACAAA  |
| Plastid | CMV163C | dnaK    | TTATTGCCGTTATGGAAGGTGGTCAACCTACCGTTGTGCCTAATTCGGAA  |
| Plastid | CMV164C | rpl3    | TTGGATTGAGAAATTTGAGTGAAGCACCTTTCTGCTTATCCCATAGGAA   |
| Plastid | CMV165C | rpl4    | AAAGGAACAGGACGTGCCAGAGCAGGTTCAAGACGCTCACCTCTTTGGCG  |
| Plastid | CMV166C | rpl23   | GTCAGTATACATTCCAAGTGTCTCCAAAATGCGCAAACCAGACTTGAGA   |
| Plastid | CMV167C | rpl2    | GAATCCTGTAGATCATCCTCATGGTGGTGAAGGTAGATGTGGTATAG     |
| Plastid | CMV168C | rps19   | TATTCATAACAGATGCATTAGTAGGGCATAAGTTGGGAGAATTTGCGCCT  |
| Plastid | CMV169C | rpl22   | AAATATCAAGCCAAATATATAAGAATGTCTCCAATCAAGTGAGGCGTGT   |
| Plastid | CMV170C | rps3    | GGGCTGAAATGCTCGTAGTGGTGAAGCATGGTCAAATTCCTTTG        |
| Plastid | CMV171C | rpl16   | AGTATAGAAAACCGCATTTAGGAAGATTAAGGGTAGAGCTAGTCGATGT   |
| Plastid | CMV172C | rpl29   | AGAAGCATGATTTGGCGAAAGAGTTGAAACAATCATGGAAACCTCATG    |
| Plastid | CMV173C | rps17   | GCTTCTTTAGGAGAGCTCATTGGATTGCTACATGCAGACCTATAAGTAA   |
| Plastid | CMV174C | rpl14   | CCTAAAGGCACAAGAGTATTTGGACCCATCGCAAGAGAATTAAGAGAAGC  |
| Plastid | CMV175C | rpl24   | GGAAATCTAAGGGTCAAATAGGTGAGGTGCTAGTCATTGATCGTAAGCG   |
| Plastid | CMV176C | rpl5    | ATATAGCTACTCAAATGTTCAATAACCGAAATACGTTCCATTTCATC     |
| Plastid | CMV177C | rps8    | TACTAGTGCTGCCAGTAGAATGAATTGGAATGTAGCTCAAGTACTCCGT   |
| Plastid | CMV178C | rpl6    | TCGTGCACAGTTAATGAAAACGATTTAGTACTTTATGTGGGATTTAGTC   |
| Plastid | CMV179C | rpl18   | GATGGCATAGTACGATGAAAGATGCTCAAGAAGTAGGTCAAAAACCTTGGC |
| Plastid | CMV180C | rps5    | ATGAATGAACAACAAGAACAGTGGCAAGAACGAGTTATACAAATTAGACG  |
| Plastid | CMV181C | secY    | TCTTCAGTGGTTTTGGGGCTACTTCTTTATAATTGTCATAGGTGTATCT   |
| Plastid | CMV182C | rpl36   | ATCAAAAGGCGTATGGAGTATTGAGAGTATTGTAAGTAAATCCAAAACA   |
| Plastid | CMV183C | rps13   | TAGCCAAAGAGATTTTAGAAGCATGTCAGTTATCACCGGATTTACGTGTG  |
| Plastid | CMV184C | rps11   | GATTCAAGATGTTACAGGCATACCACATAATGGATGTCGTCCCCAAAAC   |
| Plastid | CMV185C | rpoA    | CAACCATTACAAGATTGAAAGTGAAGGACCTGCTATAGTAACTGCGGCA   |
| Plastid | CMV186C | rpl13   | AATCCGTGACCTGATTGAAATGTGCAAGCTAACAGATTCAAGTAACG     |
| Plastid | CMV187C | rps9    | ATGTATGCCATAGGAAAACGTAATGTGCCATAGCGCGTGTATGGTTAAG   |
| Plastid | CMV188C | rpl31   | AACAAGTAGATACAGAAGGTAGAATCGAGAAATTTATGCGTAAATACGGT  |
| Plastid | CMV189C | rps12   | CGGGTCAAATTAACCTCAGGGTATGAAGTGACAGCTTATATCCAGGAAT   |
| Plastid | CMV190C | rps7    | GATGCCATTAGTATGCGTGAAGCAAGACGCGTAGGAGGTGCTACATATC   |
| Plastid | CMV191C | tufA    | CCAGTAGCCATAGAACAAGGGATGCGATTTGCCATTAGAGAAGGAGGACG  |
| Plastid | CMV192C | rps10   | CATCAGCAGCAACGATCGATGCCTAATGAAAGTAGATTTAGCTTACGGG   |
| Plastid | CMV193C | petF    | AAGGTGTCGATCTACCCTATCTTGTGCTGCTGGTGTCTGCTACTTGC     |
| Plastid | CMV194C | ycf38   | ATAGAATTTGGGTTGCTCCTTTAGTGTCCAGAAGCAGTATTTGGATCAGT  |
| Plastid | CMV195C | atpE    | CTTACAGCATTAGATATAGGTGTGATGAGAGCCAAAACCGCCCAAGGATG  |
| Plastid | CMV196C | atpB    | TTACAAGAACGTATCACCTCCACTGTTGATGGCTCTATTACCTCTATCCA  |
| Plastid | CMV197C | ycf3    | AGCCGCTTATTGGCGTAAAGCTATTCAATTAGCACCTGGTCAATATCTAG  |
| Plastid | CMV198R | atpE    | ATCGTCTAGAGGCTAGGACATCTCCCTTTCACGGAGGTAACGGGGATTC   |
| Plastid | CMV199R | atpB    | GATATAGCGTAGTTTGGTAGCGCGCTGCTTTGGGAGCAGGATGTCGCAG   |
| Plastid | CMV200C | ycf52   | AACTTGAATGCAACCATTTGGGATGTGGTTATTCATCCAGACTATCAAC   |
| Plastid | CMV201C | psaF    | GTTAACTCCTTGCCAACAAGTGAAGCTTCCATAAACGTGAAATCAATG    |
| Plastid | CMV202C | psaJ    | CCGGTAGTCGCTACTTTGTGGTTATTTTAAACAGCTGGGATTTTAATTGA  |
| Plastid | CMV203C | ORF41.2 | TTTGTGAATCTTTGTTATCTAGTACTTATGTTCTACTCATTACCTTAATA  |
| Plastid | CMV204C | apcD    | ACGTTAATTACTTATGCTCTTATCGAAGGTGATGCCATGGTCTTAGAAA   |
| Plastid | CMV205R | psaJ    | GAAATTTGGTAAACACGCATGCTTGAGGGGCATGTTTTTGGCAGTTCGAG  |
| Plastid | CMV206C | psbX    | CAAGTCTAGCAGCATTCTTTTGGAGTCTTATATGGGCAGCTGCTTAGTC   |
| Plastid | CMV207C | accD    | GTGTGTGGAATGTGATTATCATTGGCGTATGCCAGTAGAGAACGTATTG   |
| Plastid | CMV208C | psbV    | GATGACTCCCATGATCAGCTGGGCTACAGAAGTGGTCAAAGATGTTAGTG  |
| Plastid | CMV209C | petJ    | ATGCCATCATTTAGTCGTTTAACTGACAGTGATATTGAAGACGTAGCGAA  |
| Plastid | CMV210R | trnR    | GGGCTCATCGTCTAAGGGATTAGGACAGGAACCTTCTAAGTTTCTAATGT  |
| Plastid | CMV211R | trnV    | GTTAGCTCAGCGGTAGAGCGCTGCCTTACAAGCAGGTGGTCACTGGTTC   |
| Plastid | CMV212C | ycxr    | TTGGTGCCTTACTAGCTCTCATTAGTTGCCATTACGCACTTATCACTCGT  |
| Plastid | CMV213C | rps18   | ATGAAGAGAGAAAAGGAGAGAGAAGCATGAATATCCAAAGATGATGAA    |
| Plastid | CMV214C | rpl33   | GTGTGGGTATTAGCTTAGAATGCACGGCATGTCGAGCTAATGCGAATCAA  |
| Plastid | CMV215C | rps20   | CTTATGAAACATGCTACCAAAGATGAAGTTGAATCAGCCATTGATAAAGC  |
| Plastid | CMV216C | rpoB    | GAACATTAGTGTACGTGTGAGTGTGGCCGTGAAGCGTGAATCCAAGTAG   |
| Plastid | CMV217C | rpoC    | TTATCATGCCCTCACAGGATATGGTCATAGGTTGTTATTATCTCACAGCC  |
| Plastid | CMV218C | rps2    | TTAACAGTTCAAGTAAGTGAAGGTAACCGTGTCTTGTGTTGAGGAACAAA  |
| Plastid | CMV219C | tsf     | AGCGTCAAGTCAAGTAGCTGAACAATTAGTGAACAATTAGCCAATAA     |
| Plastid | CMV220C | atpI    | CACGTTATGTATTACCTACACCCATCTTATTACCTATTAATATCTAGAA   |
| Plastid | CMV221C | atpH    | CCGCGATAGGACCAGGAATCGGCCAAGGAAGTGCAGCAGCCAACGCTGTG  |
| Plastid | CMV222C | atpG    | GTTACCCGTGATGGGATTGCAAGTAGTCTTGTAAAGTTGGCTGTTAGAGC  |
| Plastid | CMV223C | atpF    | CGCCAATAGATGGTAGTCAAATCTAGATCGACATATTTCTCTCCTCAGC   |
| Plastid | CMV224C | atpD    | CAGTTAACACGTATGTGTCAAGCCAAACATTTGCAATGTGAGTATCAGGT  |
| Plastid | CMV225C | atpA    | CAGACCAGCGATCAATGTAGGTATATCAGTATCACGAGTAGGATCAGCAG  |
| Plastid | CMV226C | frC     | AATTTGCTTGTGTTCTATGCGTGAACGCAAGAATGTCATTGTATGTT     |
| Plastid | CMV227C | psaI    | TGTCAGCGTCATATTTACCATCTATATTAGTACCTACGGTGGGCTTAATT  |
| Plastid | CMV228C | psbJ    | TTGTTGCCACGATGGAGGATTGCTGTTTTAACTGTCTTAGGTTTGT      |
| Plastid | CMV229C | psbL    | GGACCAAATCCAAATAAACAACCAGTAGAATTAATCGAACATCTCTTTA   |
| Plastid | CMV230C | psbF    | TTTACCTTTGCTGGTGTAGCTATCCATGGTTTGGCGTCCCTACTGTATT   |
| Plastid | CMV231C | psbE    | GCAGGATGGTGTGTTGTAAGTACAGGATTAGCCTATGATGTTTGGAAAC   |
| Plastid | CMV232R | trnG    | GGGCATAGTTTGTGGTAAAACCCTAGCCTTCCAAGCTAGTATGCGGGT    |
| Plastid | CMV233C | ycf4    | CCAATGCCTTTGGCCGAGTTGGAACAGAAAGCCACACAGTTAGCACAAATG |
| Plastid | CMV234C | ycf49   | CAGCGATAAGTTGGCATATGACACATAATCGAGTGAATGGTGTAGTATC   |
| Plastid | CMV235C | petL    | TGGATTAGTTATCTAGGTTTCTTGATATTTTATTTTATTTAGCAGCAGC   |
| Plastid | CMV236C | psaL    | GCCGTTGGTGGTGGTGGTTCGCTTATCTTTTACTCACTTATTTTCTTA    |
| Plastid | CMV237C | ycf10   | AGCTTCCTTGAATATTTATTGTTGTGATCTTAATTCGGTGGTGGTCA     |

|               |         |        |                                                     |  |
|---------------|---------|--------|-----------------------------------------------------|--|
| Plastid       | CMV238C | ORF340 | ATAAGAATCAAGCTTATGCACTCATTGATTTTCACCTCCTAACACTAGT   |  |
| Plastid       | CMV239C | ORF147 | AGTTGGCATTTAGCTTCCAATCATCTATGTTTTCTTCTAGTCGTGTGT    |  |
| Plastid       | CMV240C | psbI   | TTTTATCGAATGATCCATCACGCAACCCGAATCGAAAAGATTGGAAATA   |  |
| Plastid       | CMV241C | ORF515 | GAAGAGCAAGTTGAAGACGATGTAAGTGAGCAAGAGTGTGAGCAAGAATC  |  |
| Plastid       | CMV242C | ycf39  | CTTAATCTCTCGTATGCTCTTCTATATTAGATTACCGTACGATCTGGT    |  |
| Plastid       | CMV243R | trnL   | AATTCAAAATTTGACGACAAAAGTCATGGGTTCAAGTCCCCTACTACC    |  |
| Mitochondrion | CMW001C | sdhC   | GCTCTGGCATTATCATTTGCTTTTAGAATTAGGGTATTTTTACCATATG   |  |
| Mitochondrion | CMW002C | sdhB   | TCATACAAAGTATATAGATGTCATACAATTATGAACTGTAAGACATG     |  |
| Mitochondrion | CMW003R | trnH   | GGCGAGTATAGCTTAGTTGGTCAAAGCGACAGACTGTGAATCTGTGATCA  |  |
| Mitochondrion | CMW004R | trnG   | AAAGGTAGAGTATAATCTTGCCAAGATTATGGTTGAGGGTTCAAATCCCT  |  |
| Mitochondrion | CMW005C | nad6   | ATTTAATAGGAAGTATTTTAGGAATTATTTCTTAGTACAACTTTCTT     |  |
| Mitochondrion | CMW006R | trnL   | GATTAGGATCTGATGGGTATCAACCCTGTGGGTTCAACTCCCCTGTC     |  |
| Mitochondrion | CMW007C | cytB   | GCATTATACGCCTCATGTGGATTTGGCATTATAGTGTAGAACATATTA    |  |
| Mitochondrion | CMW008R | trnF   | CTAGGGTTAGAGCAGAGGACTGAAAATCCTCGTGCAGAGTTCAAATCC    |  |
| Mitochondrion | CMW009R | trnK   | GGGTGCATAGCTTAGTTGGCTAAAGCATCAGACTTTAATCTGTAGATCT   |  |
| Mitochondrion | CMW010C | cox2   | GCTGTACTGTTAAAGCAGTGGGACATCAATGGTATTGGAGTTATGAATA   |  |
| Mitochondrion | CMW011C | cox3   | TCAGTAGTTTGGTGGCAGATGTAATCGTGAATCAACATATGAGGGATC    |  |
| Mitochondrion | CMW012C | ORF171 | ACCCAAATAGTTATGTGAATAAATCATGGAATTATTTACATGGTTCTGT   |  |
| Mitochondrion | CMW013C | rpl6   | ATAGAGGTATTAATTAATGTAATGAACTGAGTTCCTATGTACCTCACATT  |  |
| Mitochondrion | CMW014R | rrn5   | TGAAACTTGTGTTGTCAGAAAATACTACTTAGATGGGAATCCTGGGAAC   |  |
| Mitochondrion | CMW015R | trnM   | AGCGGACTAGTTCAGTGGCTAGAACAGCAGAATCATAATCTGCGTGTCCGG |  |
| Mitochondrion | CMW016R | trnC   | ATGCAAAAAGATTGCAAATCTTTGGATGATGGTTCAAGTCCATTCTAGCT  |  |
| Mitochondrion | CMW017R | trnP   | AGCTGGTAGCGCATCTGTTTTGGGTACAGAAGTTCGCGTGTCAAATCAC   |  |
| Mitochondrion | CMW018R | trnL   | ACGGTAGTTTCAAATCTATTACTTACTTTAAGTTTGGTTCGAGTCC      |  |
| Mitochondrion | CMW019C | cox1   | AGAATGGAATTAGTTCACCTGGTAATCAATTACTTATGGGAATCATCA    |  |
| Mitochondrion | CMW020C | nad3   | TACTATCGGTTTTCTTTATGAGTGGTTAAAGGTGCCTTAGATTGGGAGT   |  |
| Mitochondrion | CMW021C | nad1   | AACGTAAGGACCTAATGTCGTAGGTATGTTGGCCTGTTACAACCCTTA    |  |
| Mitochondrion | CMW022C | nad2   | TTAAACTTAGCGCCGACCTTCCATATGTGGAGCCAGATGTTACGA       |  |
| Mitochondrion | CMW023C | nad4   | AAAGTTCCTATGATTCCTTTCCATTTGGTTACCAGAAGCTCATGCAGA    |  |
| Mitochondrion | CMW024R | trnI   | TTAGAGCGCACGCTGATAAGCGTGAGGGTGGTTGTTCAAGTCAACTTAG   |  |
| Mitochondrion | CMW025C | nad5   | CTTATCAACTTGCAGTCAATTAGGTTACATGATATTCGCTTGTGGAATT   |  |
| Mitochondrion | CMW026C | atp8   | TTGGCTTTACTTATTATGATTGTAGCTTATAGCTTTGTAATTAAGAA     |  |
| Mitochondrion | CMW027C | atp6   | AAGGAAAGCTCTTAGTGCCCAATAGATGGCAGTATGTTATAGAAATACT   |  |
| Mitochondrion | CMW028C | ccmF   | TGGTTATTAAGCCTTGCTTTATTACATAGTTTGTGCTAACTTGAAGTT    |  |
| Mitochondrion | CMW029C | ccmA   | TCTGATTATATGCTAACCTATTTGGTTGTTAGATGAACCTGAGTCGA     |  |
| Mitochondrion | CMW030C | ccmB   | AAACAATGATTATGACATCTTCTTAGTTAAATTTACAATATCCCTTCA    |  |
| Mitochondrion | CMW031C | rpl20  | GAGAAATAAAGTAAATATAATAATCTTGTATTAAATAGTTCAATATTTA   |  |
| Mitochondrion | CMW032C | rps11  | TGGAAGCACAGGTTTCAGTGGGTTCAAGAAAATAACAATTTCTGCCATTA  |  |
| Mitochondrion | CMW033C | rps8   | ACTCCCTATTATTTAGATCTATTACATTTACTATTACATGAAGGCTTC    |  |
| Mitochondrion | CMW034R | trnW   | AAAGGAATCAAAGTTTGGTCTCCAAAACCAAAGATAAGGGTTCGAGTCC   |  |
| Mitochondrion | CMW035C | rps14  | CAAAGTTCATCATTCCAGCATTTTATGAAAGTTAGAAATCGATGTGTTTT  |  |
| Mitochondrion | CMW036C | rpl5   | AAGTTACAATTACCAGCTTTTCTAAGTGTATTATCTATGCGGACAAAGC   |  |
| Mitochondrion | CMW037C | rpl14  | CGATCTTTGGATAATATATGGACTAACTTTATAGACAACGGTGTAGTTCT  |  |
| Mitochondrion | CMW038C | rpl16  | CAACAGAATCAGGTTACATTACTGCTTCAACTGGAACCTGTCAAACGT    |  |
| Mitochondrion | CMW039C | rps3   | ACCGTCCCATTACAACTAAAGAACATGAGATTTTATATTCGACTAGAGA   |  |
| Mitochondrion | CMW040R | trnQ   | GGGATATAGCCAAGAGGTAAGGCAGTAGTTTTTGACACTAAGACCAAAGG  |  |
| Mitochondrion | CMW041R | trnR   | TGCTTGTAGCTCAATCGGATAGAGTATTAGACTACGAATCTAAAGGTTGG  |  |
| Mitochondrion | CMW042R | trnS   | GATGAATGGCTGAGCGGTTTAAAGCACTAGTCTTGAAAACCTAGCGTATTT |  |
| Mitochondrion | CMW043C | ORF267 | TTCCCAACTAATTATTTTGGCTGTTATTATGTATAAATATGAGATTATGA  |  |
| Mitochondrion | CMW044R | trnE   | TCTAAAGGTCAGGACAGTGTCTTTTTCGACGACAAAATACGAGTTCGATTC |  |
| Mitochondrion | CMW045R | trnFM  | ACTCATCAGACTCATAATCTGAAAATCATAGGTTCAAATCCTATTCCTCCG |  |
| Mitochondrion | CMW046R | trnR   | AGCTTAATGGATAGAGCATCAACCTTCTAAGTTGAGTTGTGTAGTTCAA   |  |
| Mitochondrion | CMW047C | atp9   | TTTAGCTACAATTGGTTTAGCAGGAGTTGGAGCAGGTTGGGATCGTTT    |  |
| Mitochondrion | CMW048R | trnG   | TTAATGGTAAATCATCTATCTTCCAAGTAGAAAATTATGGGTTCGAATCCC |  |
| Mitochondrion | CMW049R | trnL   | AGGTAACACGACGGACTTAAATCCGTTCCAATATGGTTATCGGTTCA     |  |
| Mitochondrion | CMW050C | rps4   | TTGCAACGAGCATCCAAGAGGTACATCAATGGATTAACCATAGATTAGTT  |  |
| Mitochondrion | CMW051R | trnS   | GGAGAGATGGCCGAGTGGTTAAGGCAATAGTTTGCTAAACTATCATATA   |  |
| Mitochondrion | CMW052R | trnV   | AATTAGCTCAGCGGTAGAGCATCTCGTTTACACCGAGGTTGTGAGCGGTT  |  |
| Mitochondrion | CMW053C | rps12  | AGCAGAAAAGGAAAGTAGCATTAGTAAAATATCAAATGATCGACGTGCA   |  |
| Mitochondrion | CMW054R | trnA   | AATTGATAGAATATATGTTTTGCACACATAAAGTTGTTGGTTCGAGTCCA  |  |
| Mitochondrion | CMW055C | sdhD   | TTATTTACACCAACCAATCTAATTTTATTTATCAACTTATTAAGAA      |  |
| Mitochondrion | CMW056R | trnD   | GAGTAATCAAAGGTAGAATATTAGTCTGTACGCTAAACGGTGCAGGTT    |  |
| Mitochondrion | CMW057R | trnY   | AGCGATAGACTGTAATCTATTGATTTATCTACGCAGGTTTCAATCCT     |  |
| Mitochondrion | CMW058R | rrnS   | ATTGATGACAGGATTAAGGACTGGAGTGAAGTCGTAACAAGGTATCCGTA  |  |
| Mitochondrion | CMW059R | trnN   | GCAATTGACTGTTAATCAATGGGTTGCTAGTTCAAATCTAGCTCAGAGAG  |  |
| Mitochondrion | CMW060C | nad4L  | TTTAGTAGTTTATATAGAATCTGTGGAACATTTCCGTTGAGTTAATTA    |  |
| Mitochondrion | CMW061C | ccmC   | GAAAACCTACATGGGAACTTGGTGGGTGTGGATGCTAGACTTACTTCA    |  |
| Mitochondrion | CMW062R | rrnL   | AGAAGAAGTAAAGGCTGACGTTTGGCCAGGTGCTTGTGGTTAATTTAT    |  |
